# Supplementary material
Source: Royal Society of Chemistry journal article supplement (doi:10.1039/d6cp01062h)
Supplement: d6cp01062h1.pdf [file d6cp01062h1.pdf]

## Supporting information for:

Qi Liang Lu,<sup>1,\*</sup> Hai Tao Hu,<sup>1</sup> Qi Quan Luo<sup>2,3</sup>

<sup>1</sup> School of Physics, Anhui University, Hefei 230601, Anhui, P. R. China E-mail:

qllufd@vip.sina.com

<sup>2</sup> Institute of Physical Science and Information Technology, Anhui University, Hefei 230601,  
China

<sup>3</sup> Department of Chemical Physics, University of Science and Technology of China, Hefei 230026,  
Anhui, P. R. China

Table S1 Cartesian coordinates of optimized  $[\text{Mg}_3@C_{20}]^+$  at the M06-2X/def2-TZVP level.

|    |           |           |           |
|----|-----------|-----------|-----------|
| Mg | -0.167839 | -0.092710 | 2.194434  |
| C  | 1.829586  | -3.053551 | 0.506077  |
| C  | 2.007302  | -3.125159 | -0.738585 |
| C  | 2.059695  | -2.982459 | -2.043959 |
| C  | 1.903746  | -2.524318 | -3.212699 |
| C  | 1.407131  | -1.573419 | -3.995635 |
| C  | 0.815801  | -0.541154 | -4.375374 |
| C  | 0.115575  | 0.579481  | -4.240587 |
| C  | -0.519336 | 1.529386  | -3.765920 |
| C  | -1.088935 | 2.287418  | -2.830074 |
| C  | -1.551768 | 2.856963  | -1.827865 |
| C  | -1.882067 | 3.161798  | -0.563415 |
| C  | -2.005124 | 3.132480  | 0.672018  |
| C  | -2.024354 | 2.918079  | 1.986699  |
| C  | -1.793464 | 2.346084  | 3.058781  |
| C  | -1.360927 | 1.481412  | 3.970477  |
| C  | -0.775822 | 0.462978  | 4.394175  |
| C  | -0.077588 | -0.666842 | 4.424404  |
| C  | 0.550355  | -1.558935 | 3.784611  |
| C  | 1.089533  | -2.256226 | 2.809868  |
| C  | 1.510812  | -2.752578 | 1.732299  |
| Mg | 0.860724  | -1.067136 | -1.765671 |
| Mg | -0.648330 | 1.164363  | -0.474429 |

Table S2 Vibrational frequencies of  $[\text{Mg}_3@\text{C}_{20}]^+$ . Positive values indicate real frequencies (stable modes). The absence of imaginary frequencies ( $-i \text{ cm}^{-1}$ ) confirms that the optimized geometry corresponds to a true minimum on the potential energy surface, with no tendency for spontaneous dissociation.

| Mode | Frequency $\text{cm}^{-1}$ | Mode | Frequency $\text{cm}^{-1}$ |
|------|----------------------------|------|----------------------------|
| 1:   | 36.83                      | 33:  | 443.68                     |
| 2:   | 37.41                      | 34:  | 452.80                     |
| 3:   | 49.82                      | 35:  | 469.09                     |
| 4:   | 63.76                      | 36:  | 492.96                     |
| 5:   | 64.47                      | 37:  | 496.49                     |
| 6:   | 67.60                      | 38:  | 502.28                     |
| 7:   | 73.96                      | 39:  | 521.71                     |
| 8:   | 78.81                      | 40:  | 534.18                     |
| 9:   | 111.39                     | 41:  | 536.07                     |
| 10:  | 114.83                     | 42:  | 544.14                     |
| 11:  | 141.36                     | 43:  | 546.28                     |
| 12:  | 146.33                     | 44:  | 559.30                     |
| 13:  | 150.31                     | 45:  | 566.44                     |
| 14:  | 168.42                     | 46:  | 627.68                     |
| 15:  | 205.13                     | 47:  | 877.79                     |
| 16:  | 219.29                     | 48:  | 883.89                     |
| 17:  | 237.72                     | 49:  | 1180.33                    |
| 18:  | 244.64                     | 50:  | 1204.13                    |
| 19:  | 298.63                     | 51:  | 1463.36                    |
| 20:  | 301.92                     | 52:  | 1476.06                    |
| 21:  | 310.70                     | 53:  | 1627.92                    |
| 22:  | 315.53                     | 54:  | 1697.95                    |
| 23:  | 337.16                     | 55:  | 1809.69                    |
| 24:  | 346.07                     | 56:  | 1941.96                    |
| 25:  | 361.86                     | 57:  | 2034.73                    |
| 26:  | 365.91                     | 58:  | 2054.49                    |
| 27:  | 388.03                     | 59:  | 2075.56                    |
| 28:  | 401.85                     | 60:  | 2152.82                    |
| 29:  | 415.27                     | 61:  | 2156.31                    |
| 30:  | 427.00                     | 62:  | 2177.95                    |
| 31:  | 434.15                     | 63:  | 2186.25                    |
| 32:  | 434.55                     |      |                            |



Figure S3 Two orthogonal sets of  $\pi$  electron delocalizations in the  $[\text{Mg}_3@C_{20}]^+$ . The electron density isosurface is plotted at 0.7 a.u. and 0.5 a.u., respectively.

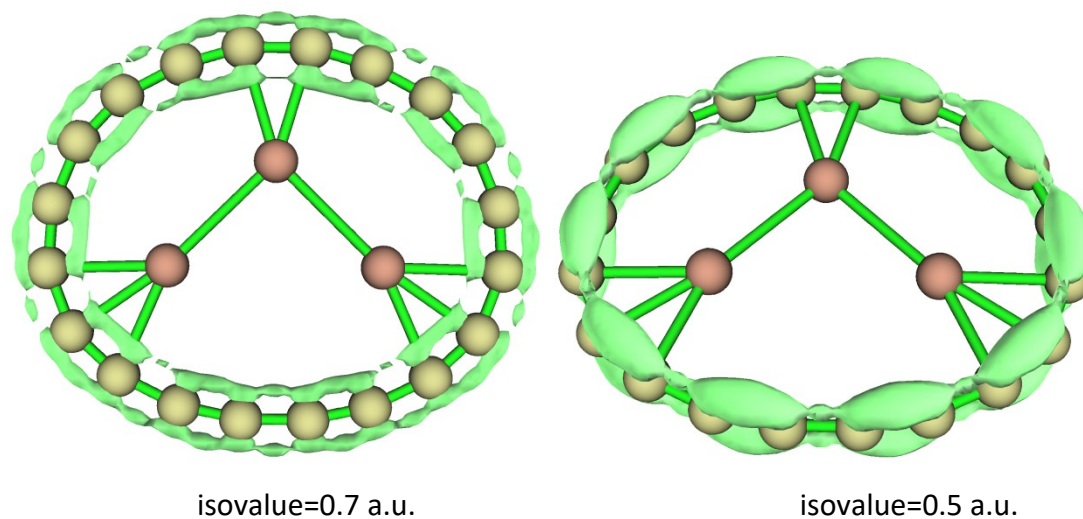

Figure S4 The color-filled localized orbital locator (LOL) map of  $[\text{Mg}_3@C_{20}]^+$ .

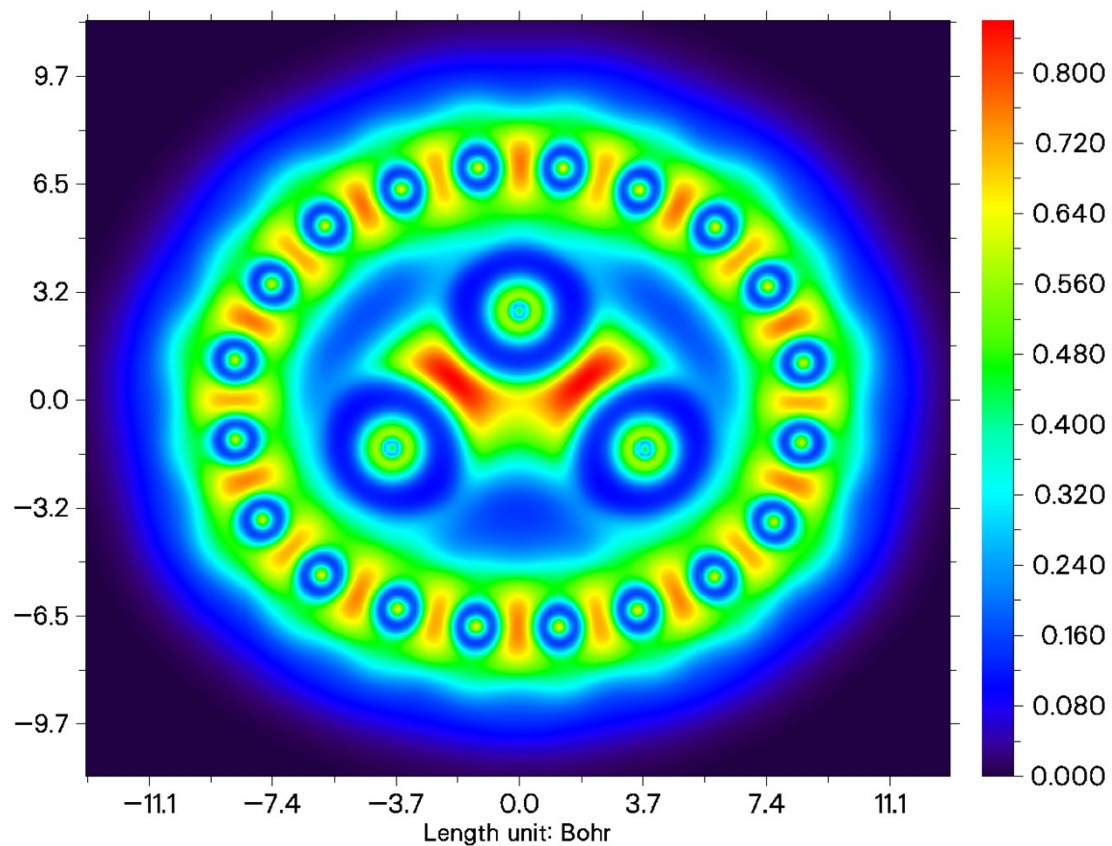

Table S3 Natural atomic orbital occupancies.

| Spin orbitals | Natural Electron Configuration |                                   |
|---------------|--------------------------------|-----------------------------------|
| Alpha         | Mg1                            | [core]3S( 0.38)3p( 0.36)3d( 0.02) |
|               | Mg2                            | [core]3S( 0.54)3p( 0.12)3d( 0.01) |
|               | Mg3                            | [core]3S( 0.54)3p( 0.12)3d( 0.01) |
| Beta          | Mg1                            | [core]3S( 0.48)3p( 0.15)3d( 0.01) |
|               | Mg2                            | [core]3S( 0.15)3p( 0.09)3d( 0.01) |
|               | Mg3                            | [core]3S( 0.15)3p( 0.09)3d( 0.01) |

Figure S5 Molecular orbital diagrams for  $[\text{Mg}_3@C_{20}]^+$  (isovalue=0.05 a.u.). Dotted and solid lines represent unoccupied and occupied orbitals, respectively.

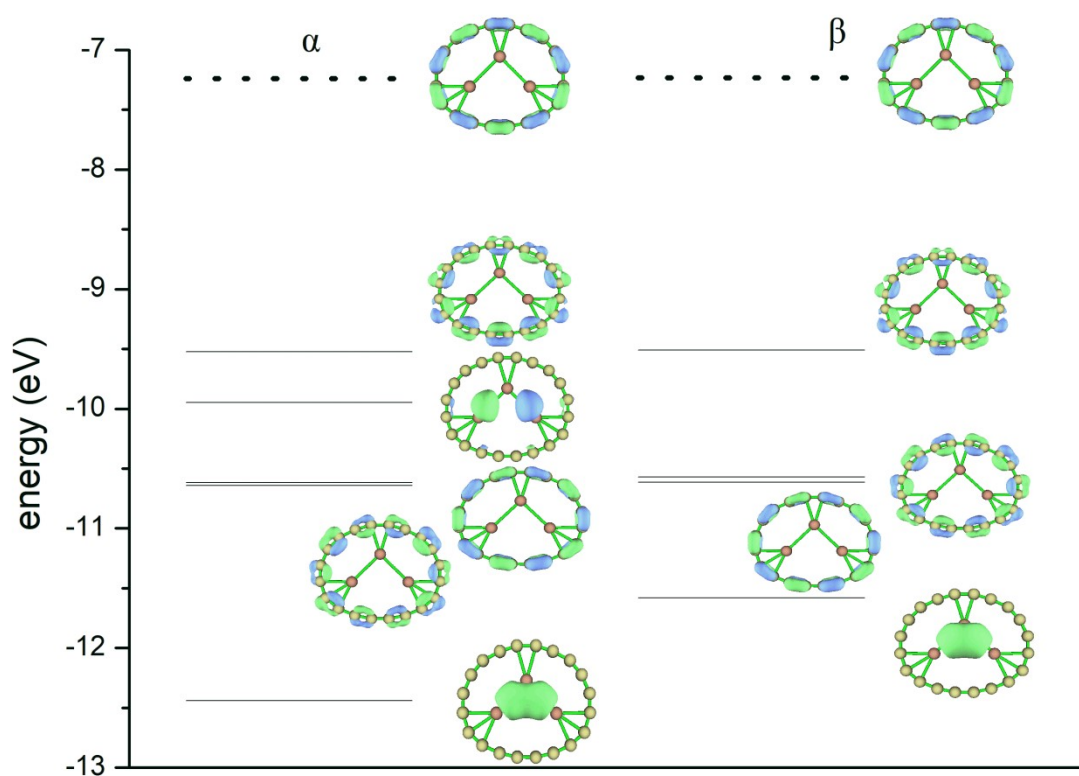

Table S4 Hyperfine coupling parameters of Mg and carbon atoms in[Mg<sub>3</sub>@C<sub>20</sub>]<sup>+</sup> (MHz). Hyperfine interaction of the isotropic Fermi contact term (A<sup>FC</sup>), the traceless spin-dipolar term (A<sup>SD</sup>) for Mg atoms are listed.

| atoms |                 | A <sub>xx</sub> | A <sub>yy</sub> | A <sub>zz</sub> | A <sub>iso</sub> |
|-------|-----------------|-----------------|-----------------|-----------------|------------------|
| Mg1   |                 | 2.7148          | 3.0328          | 5.7676          | 0.0067           |
|       | A <sup>FC</sup> | -0.0067         | -0.0067         | -0.0067         |                  |
|       | A <sup>SD</sup> | 2.7215          | 3.0395          | -5.7609         |                  |
| Mg2   |                 | -122.3191       | -122.4276       | -127.320        | -124.0223        |
|       | A <sup>FC</sup> | -124.0223       | -124.0223       | -124.0223       |                  |
|       | A <sup>SD</sup> | 1.7031          | 1.5946          | -3.2978         |                  |
| Mg3   |                 | -124.1876       | -124.2987       | -129.1782       | -125.8882        |
|       | A <sup>FC</sup> | -125.8882       | -125.8882       | -125.8882       |                  |
|       | A <sup>SD</sup> | 1.7005          | 1.5894          | -3.2900         |                  |
| C     |                 | 0.0002          | -0.2235         | 0.8067          | 0.1944           |
| C     |                 | 1.0727          | 1.2340          | 2.8935          | 1.7334           |
| C     |                 | 1.3282          | 1.4478          | 2.4968          | 1.7576           |
| C     |                 | 1.1295          | 1.2196          | 2.2048          | 1.5180           |
| C     |                 | 1.9893          | 2.1641          | 3.9364          | 2.6966           |
| C     |                 | 2.5894          | 2.7726          | 5.7950          | 3.7190           |
| C     |                 | 3.5667          | 3.8142          | 5.4551          | 4.2787           |
| C     |                 | 2.0720          | 2.2749          | 4.0008          | 2.7826           |
| C     |                 | 2.2234          | 2.4641          | 4.1564          | 2.9480           |
| C     |                 | -0.0783         | -0.3301         | 1.0497          | 0.2138           |
| C     |                 | -0.1082         | -0.3482         | 1.1325          | 0.2254           |
| C     |                 | 2.2604          | 2.4981          | 4.0824          | 2.9469           |
| C     |                 | 2.1510          | 2.3470          | 3.9789          | 2.8257           |
| C     |                 | 3.4096          | 3.6342          | 5.3847          | 4.1428           |
| C     |                 | 1.9156          | 2.0918          | 4.6651          | 2.8908           |
| C     |                 | 2.2127          | 2.3628          | 3.9540          | 2.8431           |
| C     |                 | 1.0731          | 1.1625          | 2.1051          | 1.4469           |
| C     |                 | 1.2834          | 1.4207          | 2.5636          | 1.7559           |
| C     |                 | 0.9976          | 1.1853          | 3.0321          | 1.7383           |
| C     |                 | -0.1038         | 0.3280          | 1.0078          | 0.1920           |
